# Supplementary material
Source: publisher figshare collection journal article supplement (https://sage.figshare.com/ndownloader/files/17985737)
Supplement: Supplementary file 1 [file 17985737]

Abay Asfaw is an economist at the U.S. Centers for Disease Control and Prevention (CDC), National Institute for Occupational Safety and Health (NIOSH), in the Economics Research and Support Office. Before joining NIOSH in 2008, he was a Post-doctoral fellow at the International Food Policy Research Institute and a consultant for the World Bank, Brookings Institution, World Health Organization, and International Labor Organization. Between 1999 and 2004, he was a junior and senior research fellow at the Center for Development Research (ZEF) of University of Bonn, where he obtained his PhD in 2002. His current research interests include the long-term consequences of occupational injury and illness on workers, family members, and the society; economic incentives to reduce workplace injuries; effectiveness of regulation in reducing occupational injury and illness; and impact of workplace injury on prescription drug overuse.

Toni Alterman is a senior social epidemiologist at the U.S. Centers for Disease Control and Prevention (CDC), National Institute for Occupational Safety and Health (NIOSH), in the Health Informatics Branch. She has graduate degrees in both psychology and epidemiology, and had been at NIOSH since 1992, after leaving a faculty position at the University of Texas Health Science Center, School of Public Health. Her research interests include workplace psychosocial factors, nonstandard work arrangements, work organization, job stress, opioid use, mental health, disability, and chronic disease. She has collaborated with a number of U.S. government agencies to collect health data via large national surveys to gain a greater understanding of relationships between work organization, workplace psychosocial factors, and worker health.

Brian Quay is an economist at the U.S. Centers for Disease Control and Prevention (CDC), National Institute for Occupational Safety and Health (NIOSH), in the Economics Research and Support Office. He joined NIOSH in 2017 after working for the U.S. Department of the Interior for four years. His research uses econometrics to understand the distributional impacts of workplace injury across individuals, employers, and society as a whole. His current research efforts include exploring how work impacts opioid use and misuse, the prevalence and effects of nonstandard work arrangements, and how healthy work design impacts worker well-being.
